# Supplementary material for: Wnt signaling blockade is essential for maintaining the pluripotency of chicken embryonic stem cells
Source: PubMed Central journal article supplement — Poult Sci. 2023 Dec 7;103(2):103361. doi: 10.1016/j.psj.2023.103361 (PMC10788285; doi:10.1016/j.psj.2023.103361), 2023-12-07

A

CAACTTTGTATAGAAAAGTTGGCTCCGGTGCCCGTCAAGTGGGAGAGCGCACATCGCCACAGTCCCCGAGAAGTTGGGGGAGGGTTCGCAATTGAACGGTGCCTAGAGAAGGTGG 120  
CGCGGGTAAACTGGGAAAGTGTATGTCGTGTACTGGCTCCGCCCTTTTCCCGAGGGTGGGGGAGAACCCTATATAAGTGCAGTAGTCCCGTGAACGTTCTTTTCGCAACGGGTTTGGC 240  
GCCAGAACACAGGTAAGTGCCTGTGTGGTTCGCCGGGGCTGGCCCTTTACGGGTTATGGCCCTTGGCTGCCCTGAATTAACCTCCACCTGGCTGCAGTACGTTGATTCCTCCGAG 360  
CTTCGGGTTGGAAAGTGGAGAGTTCGAGGCCCTTGGCCTTAAGAGAGCCCTTCGCTCGTGTCTGAGTTGGAGGCTGGCCCTGGGGCCGCGCTGCGCAATCTGGTGGCAC 480  
CTTCGGCCCTGTCTCGCTGCTTTCGATAAGTCTCTAGCCATTTAAAAATTTTGTAGACCTGCTGCGACGCTTTTTTCTGGCAAGATAGTCTTGTAAATCGGGCCAAAGTCTGCACACT 600  
GATTTTTCGGTTTTTGGGGCCCGGGCGCGAGGGGCCGCTGCTCCACGCGACATGTTTCGGCGAGGCGGGCCCTGCGAGCGCGCCACCAGAAATCGGACGGGGTGTCTCAAGCT 720  
GGCCGGCTGCTCTGGTCTGGTCTGGTCTGGCCGGCGGTGATFCGCCGCCGCCCTGGGCGGCAAGGCTGGCCCGTTCGGCACAGTTCGGTGGCGGAAAGATGGCCGCTTCCCGGCCCTGCT 840  
GCAGGGAGCTCAAAAATGGAGAGCGCGCGCTCGGGAGAGGGGGGGTGTAGTCAACCCACAAAAGGAAAGGGCCCTTCCGCTCCTCAGCCGCTCGCTTCATGTGACTCCACGGAGTACCGG 960  
GCGCGTCCAGGCACCTCGATTAGTCTCGAGCTTTTGGAGTACGTGCTTTTAGGTTGGGGGAGGGGTTTTATGCGATGGAGTTTCCCCACACTGAGTGGGTGGAGACTGAAAGTTAGG 1080  
CGAGCTGGCAGCTTGTATTAATTCCTTGGAAATTTGCCCTTTTTGAGTTGGATCTTGGTTCATTTCAAGCCTCAGACAGTGGTCAAAGTTTTTTTCTCCATTTTCAGGTGTGCTGA 1200  
CAAGTTTGTACAAAAAAGAGGCTGCCACCATGGGCAGCAGCCTGGACGACGAGCACATCCTGAGCGCCCTGTGACAGCGACGACGAGCTGGTCGGCGAGGACGACGACGAGGTTG 1320  
AGCGACACAGTGCAGGAGGACGAGTGCAGTCCGACACCGAGGAGGCCCTTATCGACAGGTTGCACGAGGTCGAGCCTACCAGCAGCGGCTCCGAGATCCTGGACGAGCAGAACTGATC 1440  
GAGCAGCCCGGACGCTCCCTGGCCAGCAACAGGATCCTGACCTGCCCCAGAGACCATCAGCCGGCAAGAACAAGCAGTGTGGTCCACCTCCAAGCCCACAGGCGGAGCAGGGTGTCC 1560  
GACCTGAAACATCGTGAAGAAGAGGCTGGAGGCCCCACCAGGATGTGCAGGAAACATCTACGACCCCTGTCTGCTGCTTCAAGCTGTTCTTACCAGCAGGATCATCAGCGAGACTCGTGAAGTGG 1680  
ACCAACGCCGAGATCAGCTGAAGAGGCGGGAGAGCATGACCTCCGCCACCTCAGGGACACCAACGAGGACGAGATCTACGCTTCTTCCGCACTCTGGTGTATGACCGCGCTGAGGAA 1800  
GACAAACAGCATGACACCCGACGACTGTTCCAGAGATCCCTGAGCATGGTGTACGTTAGGATGGATGAGCAGGGACAGATTCGACTTCTCTGAGTACAGTGCCTGAGGATGGACGAAAGAG 1920  
ATCAGGCCACACCTTGGGGGAAACGAGTGTTCACCCCGTGAAGAGATCTGGGACCTGTTTCATTCACAGCTGATCCAGAACTACACCCCTGGCGCCACCTGACCATCGACGAGGACG 2040  
CTGCTGGGCTTACGGGCGAGTGCCTTTCAGGGTCTATATCCCAACAAGCCAGCAAGTACGGCATCAAGATCCTGATGATGTGCGACAGCGGCACCAAGTACATGATCAACGGCATG 2160  
CCCTACCTGGGAGGGGACCCAGACCAAGCGGTGCCCTTGGCGAGTACTAGTGAAGGAGTGTCCAAGCCCGTCCACGGCAGCTGCAAGAAATCACTTCCGACAACTGGTTACC 2280  
AGCATCCCCCTGGCAAGAACCTGTGACGAGGCCCTACAAGCTGACCATCGTGGGACCGTGAAGAACAACAGAGAGATCCCGAGGTCCTGAAGAACAGCAGGTCAGGCCCCGTG 2400  
GGCACCAGCATGTTGCTTTCGACCGGCCCTGACCTGTGTGCTTCAAGCCCAAGCCCGCAAGATGGTGTACCTGTCTCCAGCTGCGACGAGGACCCAGCATCAACGAGAGCAC 2520  
GGCAAGCCCGAGATGGTGTACTACAACAGACCAAGGGCGGCGTGGACACCTGGACAGATGTGCGAGGATGATGACCTGCAGCAGAAAGACCAACAGGTTGCCCATGGCCCTGCTG 2640  
TACGGCATGATCAACATCGCTGCATCAACAGCTTTCATCATCTACAGCCACAAGTGCAGCAGAAAGGCGAGAAGGTGCAGAGCCGGAAAAAGTTTACATGCGGAACCTGTACATGGCCGTG 2760  
ACCTCCAGCTTTCATGAGGAAGAGGCTGGAGGCCCCACCCTGAAGAGATACCTGAGGACAAACATCAGCAACATCCTGCCCAAAGAGGTTGCCCGGACACGACGACAGCAGGAGG 2880  
CCCGTGTAGAGAAGAGGACCTACTGCACCTACTGTCCAGCAAGATCAGAAGAAAGGCCAGCGCCAGCTGCAAGAAGTGAAGAAGTTCATCTGCCGGGAGCACAACATCGACATGTGC 3000  
CAGAGCTGTTTCTGAACCCAGCTTCTTGTACAAAGTGGTGTATGGCCGGCGGCTTCGAGCAGACATGAAGATACACTTGTATGAGTTTGGCAAAACCAACTAGAATGCAGTGAAGAAA 3120  
ATGCTTTATTTGAAATTTGTAGTACTTGGCTTTATTTGTAACCATTAAGCTGCAATAAACAAGTTAACAACAACAATTCGATTCATTTTATGTTTTCAGGTTTTCAGGGGAGGTTG 3240  
GGAGGTTTTTAAAGCAAGTAAAACCTCTACAATGTGGTACCGCTTACATTGATTATGACTAGTTATTAATAGTAATCAATACGGGGTTCATTAGTTTCATAGCCCATATATGGAGTT 3360  
CCGCTTACATAACTTACGGTAATGGCCCGCTGGCTGACCGCCCAACGACCCCGCCATTTGACGTCATAATAGCTATGTTCCCATATAGTAACGCCAATAGGGACTTTCATTTGACG 3480  
TCAATGGTGGAGTATTTACGGTAACTGGCCACTTGGCAGTACATCAAGTGTATCAATGCAAGTACGCCCCCTTACGCTCAATGACGTTAAATGGCCGCTGGCATTATGCCCA 3600  
TCATAGCTTATGGGATTTCTTACTTGGCAGTACATCACTATTTAGTACGCTATTACCATGTTGATGTCGGTTTTTGGCAGTACATCAATGAGGCTGGATAGCGGTTTTGACTCAG 3720  
GGGATTTCCAAAGTCTCCACCCATTGACGTCAAATGGGAGTTGTTTTGGCACCAAAATCAAGCGGACTTCCAAAATGTGCGTAAACAACTCCGCCCCATTGACGCAATGGGCGGTAGGCG 3840  
TGTACGGTGGGAGGCTTATATAAGCAGAGCTCTCTGGCTAACTAGAGAACCCACTGCGCCACCATGACCGGATCAAGCCACCGTTCGCGCTCGCCACCCTGGCAGCAGCTCCCCAGGGCC 3960  
GTACGCACCCCTCGCCCGGCTTCGCCGACTACCCCGCACCGCTGATGACCGCCACATCGAGCGGGTACCAGGCTGCAAGAAGCTCTTCCACGCGCTCGCGGCTC 4080  
GACATCGGCAAGTGTGGTTCGGGACGAGCGGCGCGGTTGGGCTGTGGACACGCGGAGAGCGGTGGAAGCGGGGGCGGTGTTGCGCGAGATCGGCCCGGCAATGGCGGATTTGAGC 4200  
GGTTCGCCGCTGGCCCGCAGCAACAGATGGAAGGCCCTTGGCGCCGACCGGCCAAGGAGCCCGGTTCTTGGCCACCGTCCGGCTCTCGCCGACCCAGGCGAAGGGTCTG 4320  
GGCAGGCGGCTGCTGCTCCCGGAGTGGAGGCGGCGAGCGCGCGGGTGGCCGCTTCCP6GAGACTCCGCGCCCGCAACCTCCGCTTCTACGAGCGGCTCGGCTTCCAGCTGACC 4440  
GCCGACGCTGAGGTTGCCGAGGACCGCGCACCCTGGTGCATGACCCGCAAGCCCGGTGCCTGACTCGAGTCTAGAGGGCCGTTTTAAACCCGCTGATCAGCCTCGACTGTGCCCTTCTAGT 4560  
TGCCAGCCATCTGTTGTTTGGCCCTCCCCGCTGCTTCTTGCACCTGGAAGGTGCCACTCCCACTGTCTTCTTAATAAATAGGAAATTCATCGCATTTGCTGAGTGGTGTAT 4680  
TCTATTCTGGGGGTGGGTTGGGCGAGGACAGCAAGGGGAGGATTTGGGAAGCAATAGCAGGCACTGCTGGGATGCGGTGGGCTCTATGGCGGCGCGGCGCTTCCGCTTCTCCG 4800  
TCACTGACTCGCTGCCCTCGGTTCTCGGCTGGCGGAGCGGATATCGCTCACTCAAAGCGGTAATACGGTTATCCACAGAAATCAGGGGATAACGACGAGAAAGAACATGTGAGCAAAAG 4920  
GCCAGCAAAAGCCAGGAACCGTAAAAGGCCCGGTTGCTGGCGTTTTTCCATAGGCTCCGCCCCCTGACGAGCATCACAAAATCGACGCTCAAGTCAAGGTTGGCGAAACCCGACAG 5040  
GACTATAAAGATACCAGCGTTCCTCCCTGGAAGCTCCCTCGTGGCTTCTCTGTTCCGACCCCTGCCGCTTACCAGGATACCTGTCGCGCTTCTCTCTTCCGGAAGCGTGGCGCTTCTC 5160  
ATAGCTCACGCTGAGGATCTCAGTTCGGTGTAGGTCGTTCCGCTCCAAGTGGGCTGTGTGCACGAAACCCCGTTCAGCCCGACCGCTGCGCCTTATCCGGTAACTATCGTCTTGA 5280  
CCAACCCGGTAAGACACGACTTATCGCCACTGGCAGCAGCCACTGGTAAACAGGATTAGCAGAGCAGGATGTAGGGCGTGTACAGAGTCTTGAAGTGGTGGCTAACTACGGCTACA 5400  
CTAGAAGAACAGTATTTGGTATCTGCGCTCTGCTGAAGCCAGTTACCTTCGGAAGAGGTTGGTAGCTCTTGTATCCGGCAACAAACACCCTGGTAGCGGTGGTTTTTTTGTGTTGCA 5520  
AGCAGCAGATACGCGCAGAAAAAAGGATCTCAAGAAGATCCTTTGATCTTTTCTACGGGCTGACGCTCAGTGGAAACGAAACTCAGCTTAAGGATTTTGGTATGAGATTATCAA 5640  
AAAGGATCTTACCTAGATCTTTTAAATTAATAAAGTATTAATAAATCAATCTAAAGTATATATGAGTAACTTGGTCTGACAGTTACCAATGCTTAAATCAGTGGGACCTATCTCAG 5760  
CGATCTGCTATTTGCTTACATCAATGCTGCTGACTCCCGCTGCTGATATACTAGTACGAGGAGGCTTACCATCTGGCCCAAGTGTGCAATGATACCGCGAGACCCAGCTCAC 5880  
CGGCTCCAGATTTATCAGCAATAAACGAGCCAGCGGAGGGCCGAGCGGCGGGTGGCCGCTTCCP6GAGACTCCGCGCCCGCAACCTCCGCTTCTACGAGCGGCTCGGCTTCCAGCTGACC 6000  
GTTCCGCGTAAATAGTTTGGCAAGTGTGGCATTGCTACAGGCACTGCTGGTGTACGCTGCTGTTGGTATGGCTTCACTCAGCTCCGCTTCCCAACGATCAAGCGAGTTACAT 6120  
GATCCCCATGTTGTGCAAAAAAGCGTTAGCTCCTTCGGTCCCTCCGATCGTTGTCAGAAAGTAAAGTGGCGCAGTGTATCACTCATGTTATGGCAGCACTGCATAAATCTCTTACTG 6240  
TCATGCCATCCGTAAGATGCTTTTCTGTGACTGGTGTACTCAACCAAGTCACTTCTGAGAATAGTGTATGCGCGACCGGAGTGTCTTTCGCCGGCGTCAATACGGGATAAATACCGCG 6360  
CACATAGCAGAACTTTAAAAGTGTCTCATCTTGGAAAACGTTCTTCGGGGGCAAAACTCAAGGATCTTACCCTGTTGAGATCCAGTTCGATGTAACCCACTCGTGCACCCAACTGAT 6480  
CTTCAGCATCTTTTACTTTCACCGCTTTTCTGGGTGAGCAAAAACGGAAGGCAAAATGCCGCAAAAAGGGAAATAAGGGCGACACGGAATGTTGAATACTCATACTCTTCTTTTTC 6600  
AATATTATTGAAGCATTTATCAGGGTTATTGCTCATGAGCGGATACATATTTGAATGATTTAGAAAAATAAACAATAGGGGTTCCGGCGCACATTTCCCGGAAAAGTGCACCTGACG 6720  
TCTAAGAAACCATTTATCATGACATTAACCTATAAAAATAGGCGTATCACGAGGCCCTTTCGTCGGCGCGCCGCGGCCG 6802

EF1α promoter
 hypBase
 SV40 poly (A) signal

CMV enhancer + CMV promoter
 PuroR
 AmpR

TTAACCCGTAGAAAGATAGTCTGCGTAAATATGACGCATGCATTCCTTGAATATTGCTCCTCTTTTCAAATAGCGCGAATCCGCTCGCTGTGCATTTAGGACATCTCAGTCGCCGGCTTGG 120  
 GCTCCCGTAGAGGCGTGGTTGTCATAGGGTAAAGTGTCTACTGATTTTGAAGTATAACGACCGCGGTGAGTAAAATGACGCATGATTAFCTTTAGCTGACTTTTAAGATTTAACTCATACG 240  
 AATAATTATATGTTATTTCTACTTACGTTGATAAATATTATATATATATTTCTTGTATAGATAATCACTTTGTATAGAAAAGTTCGCTCCGGTGCCTGCGTGGGA 360  
 SAGCGCACATCGCCACAGTCCCGGAGAGTTGGGGGAGGGGTCCGCAATTAACCCGTTGCCAGTCCAGTAACTGGGAAAGTATGTCGTACTGCTCCGCCCT 480  
 TTTCCCGAGGGTGGGGAGAACCGTATAAAGTGCAGTAGTCCCGTGAACGTTCTTTTCGCAACGGGTTTCCGCCCAGAACACAGTAAAGTCCGCTGTGTGGTCCCCTGGCCTGGC 600  
 CTCCTTTACCGGTTATGCGCCCTGCGTGCCTTGAATTAATCTCCACTCAGCTGCGTGCAGTACGTATCTTGAATCCGAGCTTCCGGTGGAAAGTGGGAGGATTCGAGGCCCTTCCGCTTAA 720  
 SAGCCCTTCCGCTGTGCTTGAAGTTGAGGCTTGGCCCTGGGCGCTGGGCGCGCGGTGCGCAATCTGTTGGCACCCTCCGCGCTGTTCGCTGCTTTCGATAGCTCTTAGCCATTAA 840  
 AATTTTGTAGACTGCTGCGGAGCTTTTCTGGCAAGATAGTCTTGAATGCGGGCCCAAGATCTGCACACTGGTATTTCCGTTTTTGGGCCCCGGCGCAGCGGGCCCGTGGC 960  
 TCCACGCGACATGTTCCGGAGGCGGGCCCTGGGAGCGCGCCACCAGAAATCGGACGGGGTAGTCTCAAGCTGGCCGCCCTGTCTGGTGCTGGTCTCCGCGCCGCTGTATCGCC 1080  
 CCGCCTGGGCGCAAGGCTGGCCCGTGGCCAGGAGTGTGCTGAGCGGAAAGATGGCCGCTTCCGCGCCTGTGCAGGGAGCTCAAAATGGAGGACGGCCGCTGGGAGAGCGGGCG 1200  
 GTGAGTCAACCCACAAAAGGAAAGGGCTTTCCGCTCTCAGCCGCTGCTTCAATGTACTCCAGCAGTTCAGGTTGCTGCAAGAAGTTGTTACAAAAGAGCTGCCACCATGGTGAACAAGGG 1320  
 TCGTCTTTAGGTTGGGGGAGGGTTTTATGCGATGAGTTTTCCCCACACTGAGTGGTGGAGACTGAAGTTAGGCCAGCTTGGCAGCTTGATGTAATTTCTCTTGGAAATTTGCCCTTTT 1440  
 SAGTTTGGATCTTGGTTTACTTCAAGCTCAGACAGTGGTTCAAAGTTTTTTCTCCATTTACAGGTGCTGTCGAAGAATTTGTACAAAAGAGGCTGCCACCATGGTGAACAAGGG 1560  
 GAGCCCTGTAGCATCTGACTTCTGGCTAATAAAGGAATTTATTTCATTGCAATAGTGTGTTGAATTTTGTGTCTCACTCGGAAGGACATATGGGAGGCAAAATCATTAAAAA 1680  
 AAGTTCATCTGCACCACCGCAAGCTGCCCGTGCCTGCCCACCTCGTACCACCTGACCTACGGCGTGCGTGTAGCCGCTACCCGACCACATGAAGCAGCAGCTTCTTC 1800  
 AAGTCCGCCATGCCGAAGCTACTCGCAGGAGCCACCCTTCTTCAAGGAGCAGCCAACTACAAGACCCTCCGCGGAGTTGAAGTTTCGAGGGCCAGACCCCTGGTGAACCGCATCGGA 1920  
 CTGAAGGGCCTCCGATTCGAAGGAGCGGCAACATCTTGGGCAACAACTGGGTAACAACAACAGCCACACCTCTATATCATGGCCGACAGCAGAAGAACGGCTCAAGGTGAAC 2040  
 TTCAAGATCGCCACAACATCGAGGAGCGGAGCGTGCAGCTCGCCGACCCTACCAGCAGAACCCCCCATCGGCGACGGCCCGTGTCTGCTGCCGACAACCTACCTAGCACCCAG 2160  
 TCCGCCCCGAGCAAAAGCCCCAACGAGAAGCGGATCATAGGTTGCTGCGTGGAGTTCTGTGACCCGCGCCGAGTCTCCGCACTGGAGGAGCTGTACAAGTAACTACTTATTATACA 2280  
 TAGTTGATCTCAGGTGCAGGCTGCCTATCAGAAGTGGTGGTGGTGGCCAAATCCCTGGCTCAAAAATACCCTGAGATCTTTTCCCTCGCAAAAATTATGGGACATCATGA 2400  
 AGCCCTGTAGCATCTGACTTCTGGCTAATAAAGGAATTTATTTCATTGCAATAGTGTGTTGAATTTTGTGTCTCACTCGGAAGGACATATGGGAGGCAAAATCATTAAAAA 2520  
 ATCAGAAAGTATTTGGTTTAGAGTTTGGCAAATATGCCCATATGCTGGTGCATGAACAAAGGTTGGCTATAAAGAGGTCATCAGTATATGAACAGCCCCCTGCTTCCATTCT 2640  
 TATTCATAGAAAAGCCCTGACTTGGGTTAGATTTTTTTTTATATTTTGTGTTTGTGTTATTTTTTTCTTAAACATCCCTAAAATTTTCTTACATGTTTTACTAGCCAGATTTTTCTTCC 2760  
 TCTCTGACTCCACCCATAGCATAGTCCCTTCTCTTTATGGAGATCCCTCGCCAGCAAGCTTCCGCTGACATTTGACTTATTTGACTGAGTTGATGTTGACTGATGTTAGTTG 2880  
 GTCATTAGTTCATAGCCATATATGGAGTCCCGTACATAACTTACGGTAAATGGCCCGGCTGGCTGACCGCCAACGACCCCGCCATTCAGTCAATAATGACGTATGTCCCAT 3000  
 AGTAAGCCAAATAGGACCTTCCATTCAGTCAATGGGTGGAGTATTACGGTAAACTGCCCATTTGGCAGTACATCAAGTGTATCATATGCCAAGTACGCCCCCTATTCAGCTCAATGA 3120  
 CCGTAATAGGCCCGCCTGGCATTATGGCCAGTACATGACCTTATGGAGTTTCCCTACTTGGCAGTACATCTAGTATTAGTTCATGCTATTTAGTCAATGGTGTGGGGTTTGGCAGTACAT 3240  
 CAATGGGCGTGGATAGCGGTTGACTCACGGGATTTCCAAGCTCCACCCTTTCAGCTCAATGGGAGTTGTGTTTGGCACCAAAATCAACGGGACTTTCCAAAATGTCGTAACAACCTC 3360  
 CGCCCTGTACGCAAAATGGGCGTAGGCGTGTACGTTGGGAGGTTCTATPAAGCAGAGCTTCTGTGCTTACAGATAGAGAACCCCTGCGCCACTATGACGAGTACAAGCCACCGTGGCC 3480  
 CTGCCACCGCGACGCTCCGAGGCGCTACGCCCTTCCGCGGCTTCCGCGACTACCCCTGAGCCACCCCTGATCGCCGACGACAGCCGATGACGAGCGCTACCCAGCTTCC 3600  
 CAAGAATCTTCTCACGCCGTCCGCTGCAGACTCGCAAGGTGCTGGTCCGCGCACACCGCCGCGCGTGGCGGTCTGGACACCGCCGAGGAGCTCGAAGGCCGTTTTCGCC 3720  
 GAGATCGCCCGCGCATGGCGAGTTGAGCGTTPCCCGGCTGGCCGCGCAGCAACAGATGGAAGGCTCCTGGCGCGCACCCGCCCAAGAGGACCCGCGTGGTTCCCTGGCCACCCTCCGG 3840  
 GTCTCGCCGACCCAGGGCAAGGTTGGCCAGCGCGCTGCTGCTCCCGGAGTGGAGCGCGCGAGCGCCGCGGTTGCCCGCTTCCCTGGAGCTCCGCGCCGCACTCCTCCC 3960  
 TTCTACGCGCTCCGCTCACCGTACCCGACGCTCGAGTTCCGCAAGGACCGCCGCTGTGCTGACTGACCAACCCGCTTCCGCTGACTCGAGCTAGAGGGCCTTTAAACC 4080  
 CGCTGATCAGCTCGACTGTGCTTCTAGTTPCCAGCAGCATCTGTGTTTGGCCCTCCCGCTGCTTCCCTTACCCTGGAAGTGCCTCCCCTGCTCTTCTTAATAAAAATGAGGAA 4200  
 ATTGCAATCGCATTTGTCTGAGTAGTGTGCTTCTATTTCTGGGGGTGGGGTGGGGCAGGACAGCAAGGGGGAGGATGGGAAGACAATAGAGGCCATGCTGGGGATCGGGTGGCTTATG 4320  
 GCTCGAGTTAAATTAACGAGAGCAATAATTTGATATGTCGCAAAGTGTTTCTGACTGACATAAAGTAAATTTGTTTCTATTATGATATAGGTTAAGCTAATTAATTTAATAACA 4440  
 ACATGACTGTTTTAAAGTACAAAATAAGTTTTATTTGTAAGAGAGAGAATGTTTTAAAGTTTTGTTACTTTTATAGAAGAAATTTGAGTTTTTGTTTTTTTAAATAAATAAATA 4560  
 AATAAATAATTTGTTGTTTATTTAGTTATGTAAGTAAATTAATAAATAAATAAATTAATTAATTAATAAATAAATAAATAAATAAATAAATAAATAAATAAATAAATA 4680  
 TTTATAGCATAATGTTTAACTAGCTCACAATGATTTACTTTCAGGTTTAAATAATAGTTTTCTAAATTTTTTATTATTTACTGCTGTGCTGAAATACCGAGCTCCAATTCGCC 4800  
 CTTATGAGTGTGCTATTACAAATCACGTGGCCGTGTTTTACAACCTGTGACTGGGAACCCCTGGCTTACCACCTAATCGCCTTGACAGCACATCCCCCTTTCCGACCTGGCGTAA 4920  
 TAGCGAAGAGGCGACCCGATCGCCCTTCCCAACAGTTGCGCAGCCTGAATGGCGAATGGGACGCGCCCTGAGCGGCGCATTAAGCGCGGGGTGGTGGTGTACCGCGAGCGTGAC 5040  
 CGCTACACTTGGCCAGCGCCCTAGCGCCGCTTCTTCCCTTCTTCTCCGACGTTCCGCGGCTTTCCCGCTCAAGCTTAAATCGGGGGCTCCCTTTAGGGTTCCGATT 5160  
 TAGTGTCTTACGGCACCTCGACCCAAAATAAATTTGATTAGGTTGATGGTTACGTAAGTGGGCCATCGCCCTGATAGACGGTTTTTCCGCTTTGACAGTGGAGTCCACGTTCTTTAATAG 5280  
 TGGACTCTGTTCCAACCTGGAACAACACTCAACCTATCTCGGTCTATCTTTTATTTAAGGATTTTGGCGATTTCGGCTATTGGTTAAAAAATGAGCTGATTTAACAAAATTT 5400  
 TAACGGGAATTTTAAACAAATTTAAGCCTTACAAATTTAGTGGCACTTTTCCGGGAATTTGGCGGAAACCCCTATTGTTTATTTTTCTAAATACATTTCAAAATATGATCCCGCTCATG 5520  
 AGACAATAACCTGATAAATGTTCAATAAATTTGAAAAAGGAAGATATGAGTATTCAACATTTCCGCTGCGCCCTTATCCCTTTTCCGCTTTTGCCTTTTGTCTCAC 5640  
 CCAGAACGCTGGTGAAGATAAAGATGCTGAGATCAGTTGGGTGACAGAGTGGTTTACATCGAATGGATCTCAACAGCGGTAAAGATCTTTGAGAGTTTTCCGCCCCGAAAGACGTTTT 5760  
 CCAATGATGAGCACTTTTAAAGTCTGCTATGTGGCCGCGTATTATCCGCTATTGACCGCGGGAAGAGCACTCGTCCGCCATACACTATTTCTAGAATGACTTGGTTGAGTACTCA 5880  
 CCACTACAGAAAAGCCTTTACGGATGGCAGTAAAGAGAAATTTAGCAGTGTGCTGCTAACCAGTAACTGATGATTAACACTGCGGCCAATCTACTTCTGACAAAGCAGTCCGAGGAGCCGAA 6000  
 GAGCTAACCGCTTTTTCGACACATGGGGGATCATGTAACCTCGGCTGATCGTGGGAAACCGGAGCTGAATGAAGCCATACCAAACGACGAGCGTGACACCAGATGCCGTGAGCAATG 6120  
 GCAACAAAGTTGCGCAACTATTAACTGGCGAATTAATCTACTTACCTTCCGCGCAACAATAAATAGACTGGAAGGCGGATAAAGTTGCAGGACACTTCTGCGCTCGGCCCTTCCG 6240  
 GCTGGCTGGTATTGCTGATAAATCGGAGCGGTGAGCGTGGGCTCGCGGTATCATGAGCACTGGGCGCAGTGGTAAAGCCTCCCGTATCGTATTCTACACGAGCGGGAGT 6360  
 CAGGCAACTATGGATGAACGAAATAGACAGATCGCTGAGATAGGTGCGCTCACTGATTAAGCATTTGTAACCTGTGACAGCAAGTTTACTCATATATACTTTAGATTGATTTAAACCTT 6480  
 TTTTAAATTTAAAGGATCTAGGTGAAGATCCCTTTTGTATAATCTCATGACCAAAATCCCTTAAAGCTGAGTTTTCGTTTCCACTGAGCGTACAGCCCGTAGAAAAGATCAAAGGATCTTCT 6600  
 TGAGATCTTTTTTTCTGCGGTAATCTGCTGCTTGAACAAAATAAACCCCGTACCAGCGGTGGTTTGTGTTGCCGATCAAGAGCTACAACTCTTTTTCCGAAGGTAACCTGGCTTC 6720  
 AGCAGAGCGCAGATACCAATACTGTTCTTCTAGTGTAGCGTGTAGCGCACCACTTAAGAAGCTGTAGCAGCGCCTACATACCTGCTGTGTAATCTGTTTACCAGTGGCTGT 6840  
 GCCAGTGGCGATAAGTGTGTTTACCAGCTTGGACTCAAGACGATAGTTACCAGGATAAGGCGCAGCGTGGGCTGAAACGGGGGTTTCGTGCACACAGCCAGCTTGGAGCGAACGACC 6960  
 TACACGAACTGAGATACCTTACAGCGTGGCTGTAGGAAAAGCGCCACGCTTCCGAAGGGAAGGCGGACAGTATCCGGTAAGCGGCAAGGTCGGAACAGGAGAGCGCAGGAGGAG 7080  
 CTTCAGGGGGAAACCGCTGTTATTTTATAGCTGTCGGGTTTCGCCACTTCTACTGAGCGTCAATTTTTGTGATGCTGCTGACGGGGGCGAGCCTATGGAAAACCGCCAGCAAC 7200  
 GCGGCCTTTTTACGGTTCCTGGCCTTTTGTGCGCTTTTGTCTACATGTTCTTCTGCGTTTATCCCTGATTTCTGTGGATAACCGTATTACCGCTTTGAGTGAAGTATACCGCTGCG 7320  
 CGCAGCGAACGACCGAGCGCAGCTGAGTGCAGGAGAAGCGGAAGAGCGCCAAATACGCAAAACCGCTTCCGCGCGCTTGGCCGATTGATTAATGACAGTGGCACGACAGGTTT 7440  
 CCCGACTGAAAAGCGGCAAGTGAAGCAACGCAATTAATGTGAGTTAGCTACTCATTAGGACCCAGGCTTTTAACTTATGCTTCCGGCTGATGTTGTGGAAATTTGAGCGGGA 7560  
 TAACAATTTCACACAGGAAACGATGACATGATTAACGCAAGCTGAAATTAACCTACTAAGGGAACAAAAGGCTGTACCTCGCCGCACTTGGTTGGCATCTTTTAGCGCGCG 7680  
 TCGCTACACAGCTTGGCCACAATGTGGTTTTGTCAACGAAATTTCTATGACGTGTTTTAAAGTTTAGTTCGAGTAAAGCGCAAACTTTTT 7773

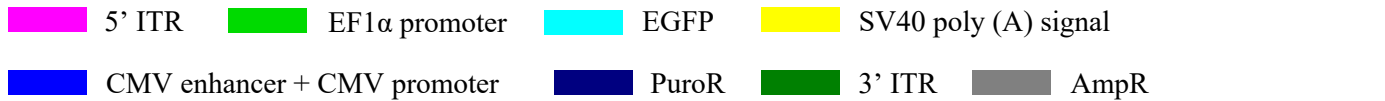

Supplement: mmc1.pdf [file mmc1.pdf]
