# Supplementary figures and images for: Wnt signaling blockade is essential for maintaining the pluripotency of chicken embryonic stem cells
Source: PubMed Central journal article supplement — Poult Sci. 2023 Dec 7;103(2):103361. doi: 10.1016/j.psj.2023.103361 (PMC10788285; doi:10.1016/j.psj.2023.103361), 2023-12-07

A

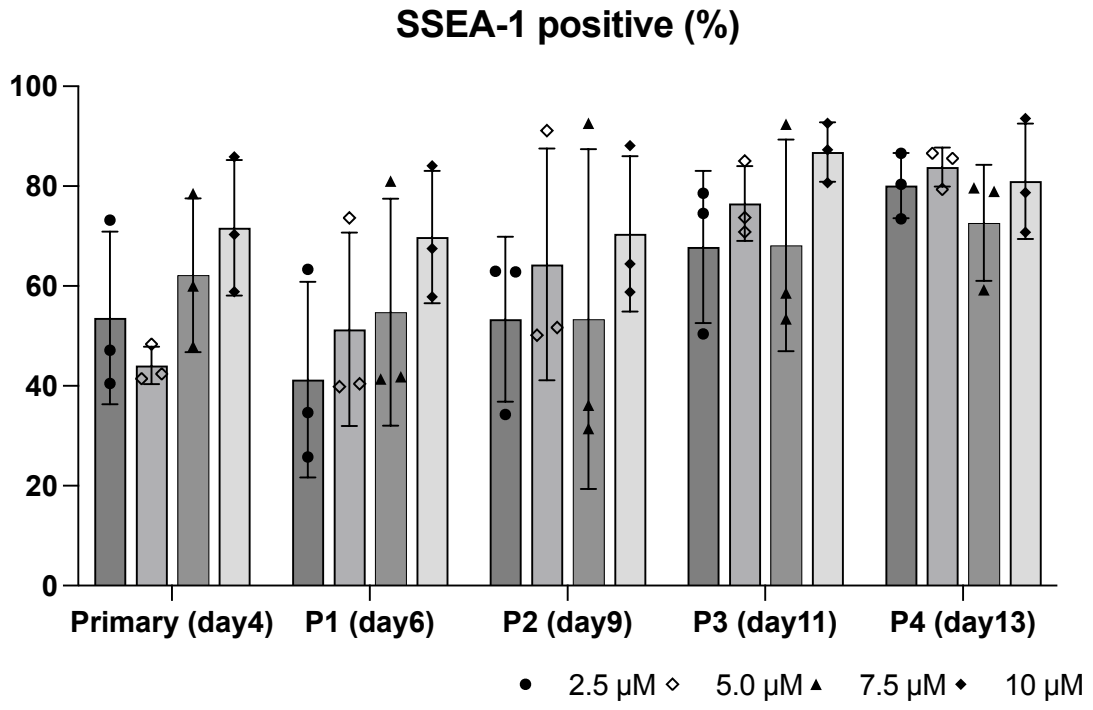

B

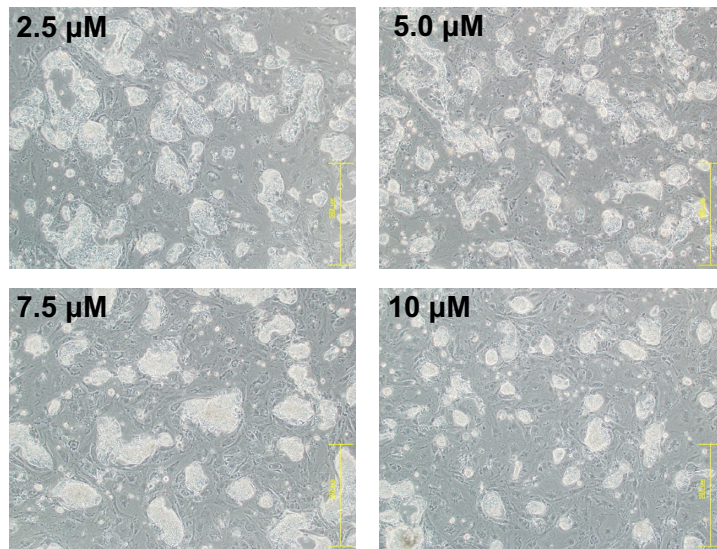

Supplement: mmc2.pdf [file mmc2.pdf]

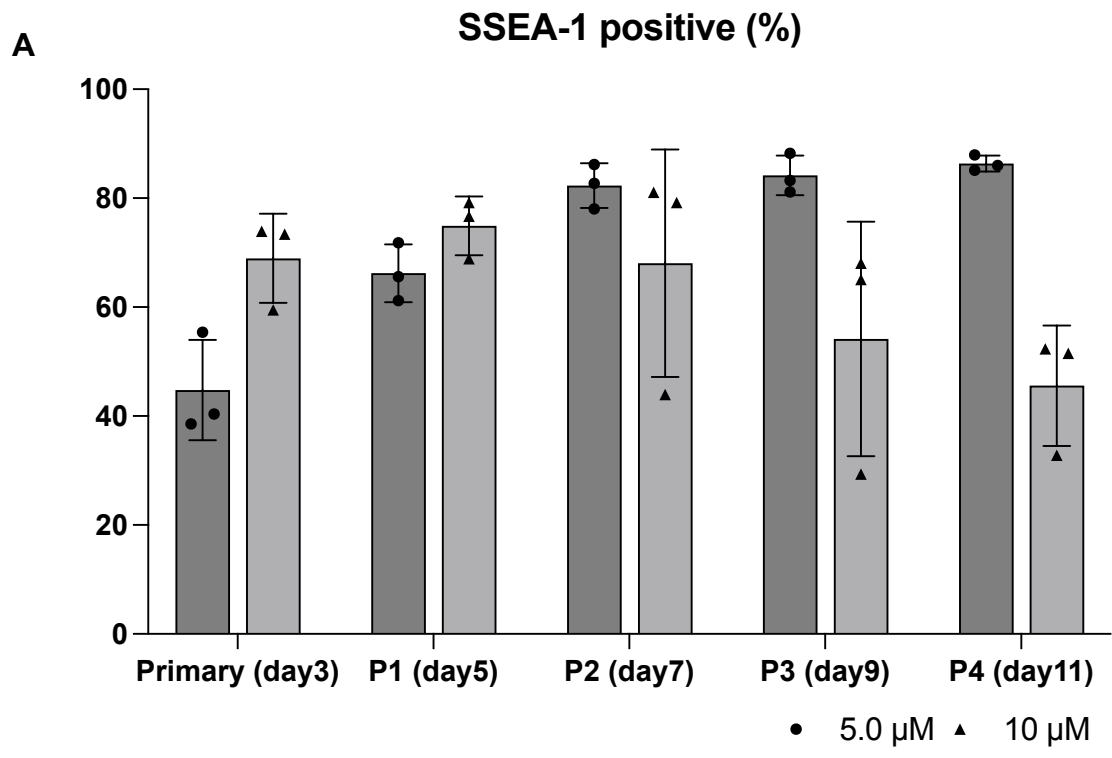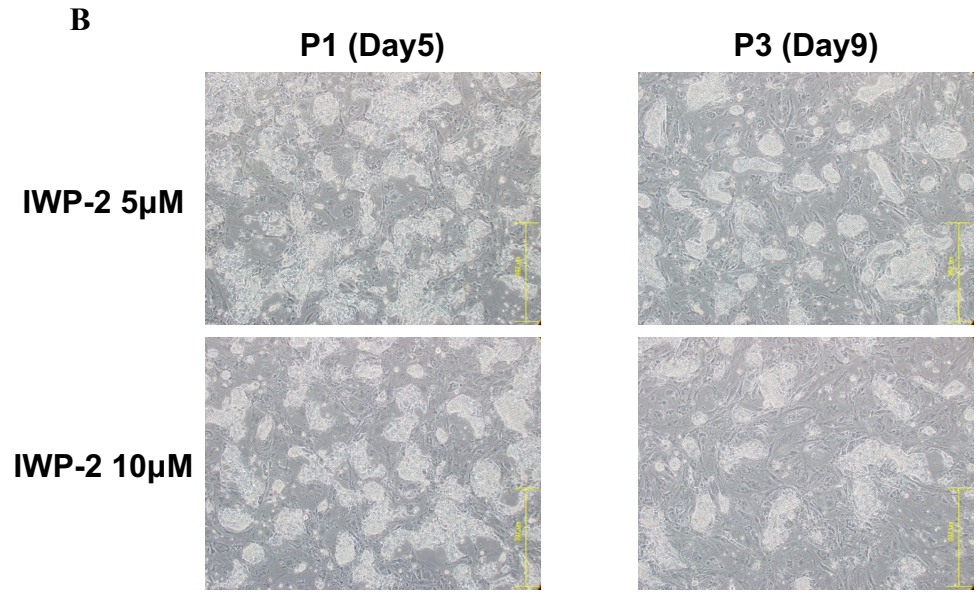

Supplement: mmc3.pdf [file mmc3.pdf]

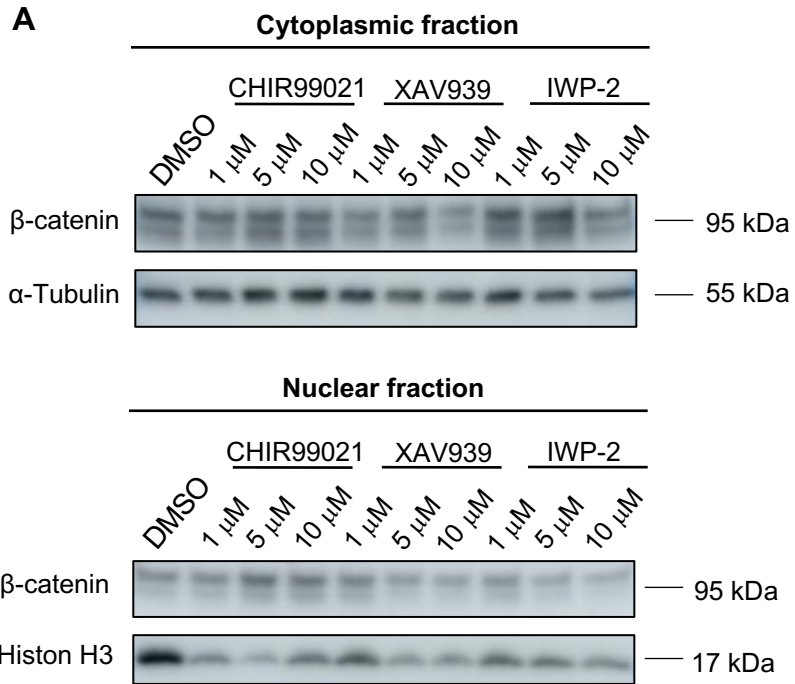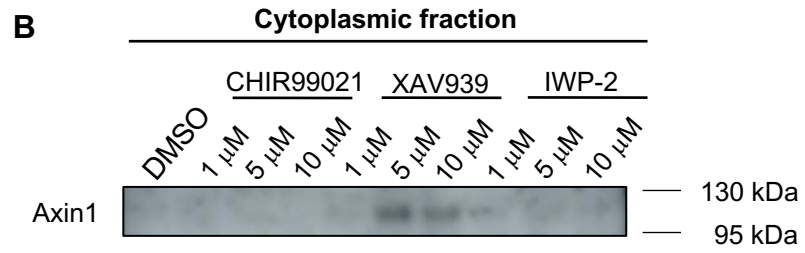

Supplement: mmc4.pdf [file mmc4.pdf]
